# Supplementary material for: Quantifying immune-based counterselection of somatic mutations
Source: PubMed Central journal article supplement (PMC6657826; doi:10.1371/journal.pgen.1008227), 2019-07-25

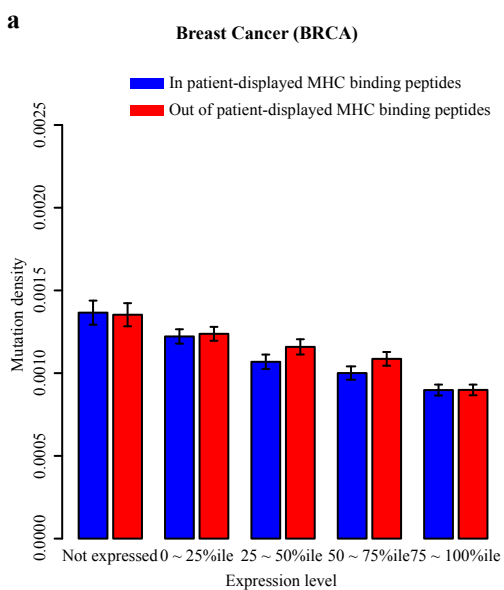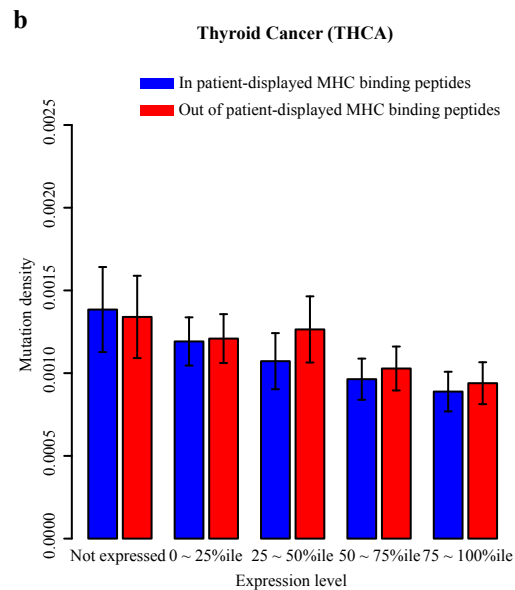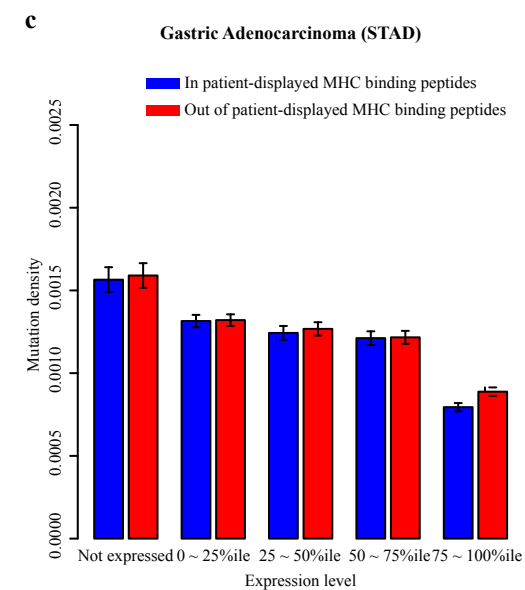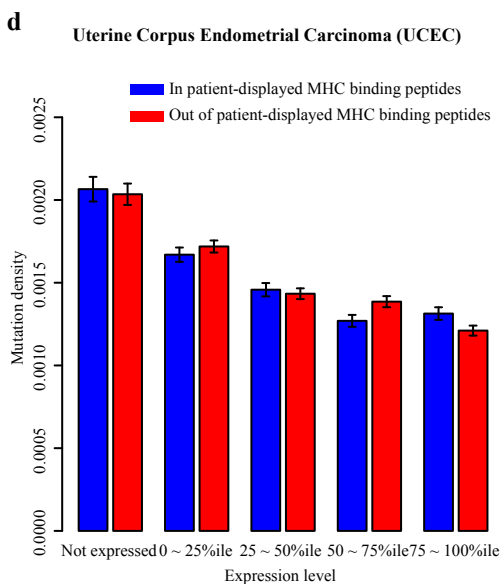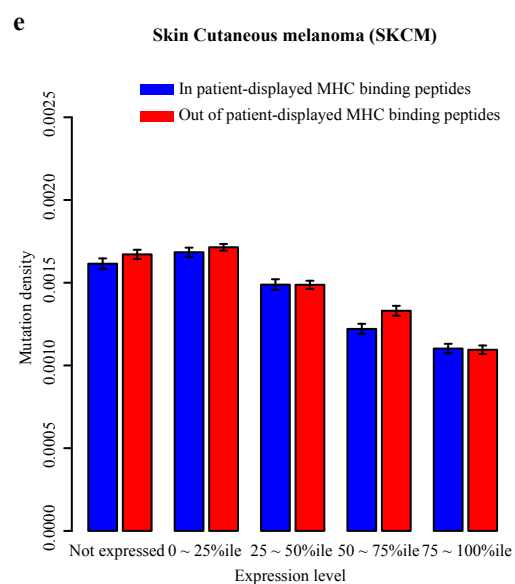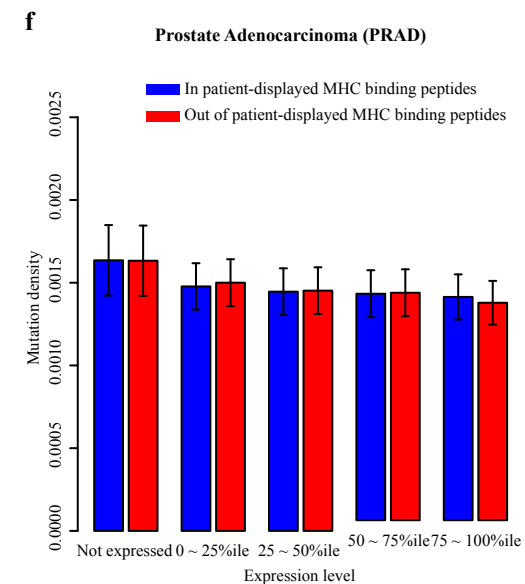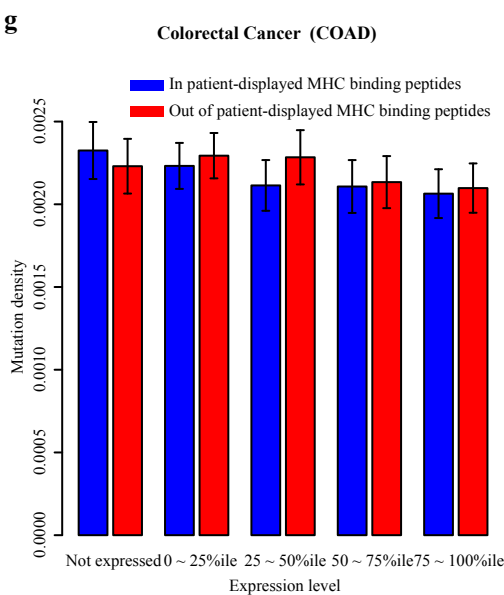

Supplement: pgen.1008227.s004.pdf [file pgen.1008227.s004.pdf]
